# Supplementary material for: CD177 modulates the function and homeostasis of tumor-infiltrating regulatory T cells
Source: PubMed Central journal article supplement (PMC8486774; doi:10.1038/s41467-021-26091-4), 2021-10-01
Supplement: 41467_2021_26091_MOESM4_ESM.pdf [file 41467_2021_26091_MOESM4_ESM.pdf]

## **Description of Additional Supplementary Files**

**Supplementary Data 1:** DEGs between TI-Treg cells and PB-Treg cells from ccRCC single cell RNAseq.

Wilcoxon rank sum test with p-values adjusted using the Bonferroni method.

**Supplementary Data 2:** DEGs between TI-Treg cells and PB-Treg cells from HCC single cell RNAseq

Wilcoxon rank sum test with p-values adjusted using the Bonferroni method.

**Supplementary Data 3:** All genes for pseudotime analysis in Figure 2B.

**Supplementary Data 4:** Treg gene signatures from ccRCC single cell RNAseq used for filtering in Figure 3.
